# Supplementary material for: Detailed investigation of a NaTi2(PO4)3 anode prepared by pyro-synthesis for Na-ion batteries
Source: Royal Society of Chemistry journal article supplement (doi:10.1039/c6ra06533c), 2016-01-01
Supplement: c6ra06533c1.pdf [file c6ra06533c1.pdf]

## Supplementary information

### Detailed investigation of a $\text{NaTi}_2(\text{PO}_4)_3$ anode prepared by pyro-synthesis for Na-ion batteries

Yubin Niu,<sup>a,b</sup> Maowen Xu,<sup>a,b,\*</sup> Yan Zhang,<sup>a,b</sup> Jin Han,<sup>a,b</sup> Yan Wang<sup>a,b</sup> and Chang Ming Li<sup>a,b,c,\*</sup>

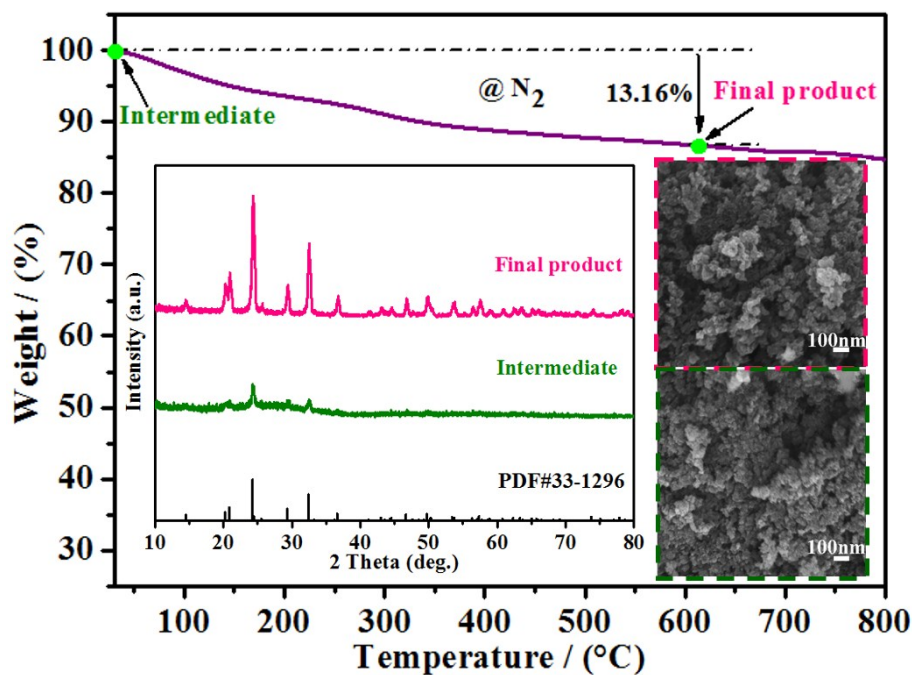

Fig. S1. TGA analysis of the intermediate under  $\text{N}_2$  at a heating rate of  $5\text{ }^\circ\text{C min}^{-1}$ . (Insets show XRD patterns and FESEM images of the intermediate and final product, respectively.)

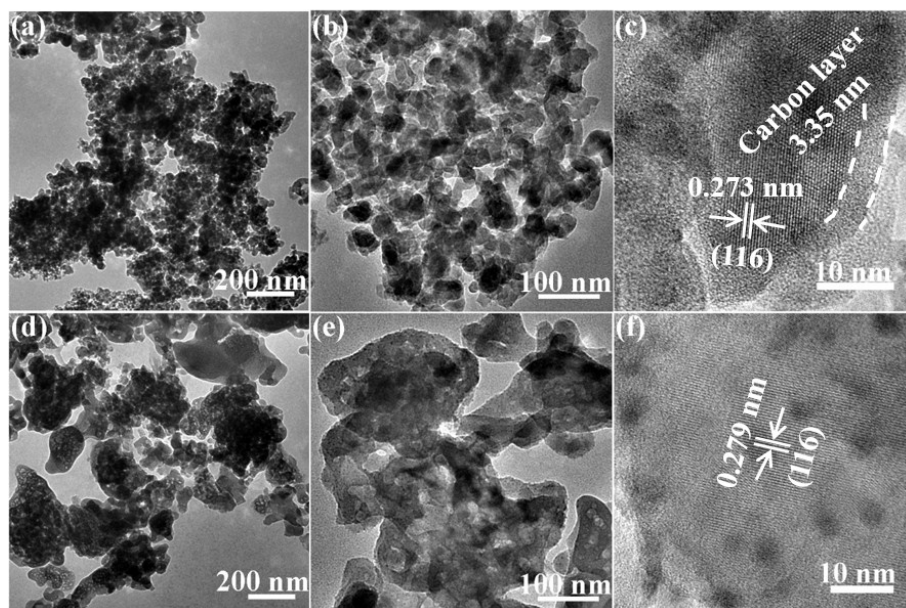

Fig. S2. TEM and HRTEM images of p-NTP NPs (a, b and c) and NTP powders (d, e and f), respectively.

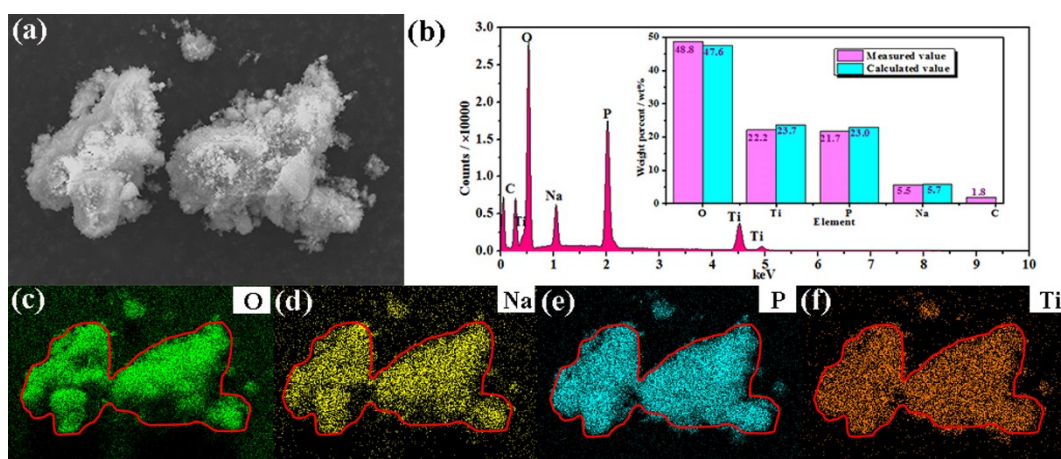

Fig. S3. (a) Nitrogen sorption isotherm and the inset shows pore size distribution of as-prepared samples; (b) Schematic illustration for the penetration of the electrolyte and porosity of NTP powders and p-NTP NPs, respectively.

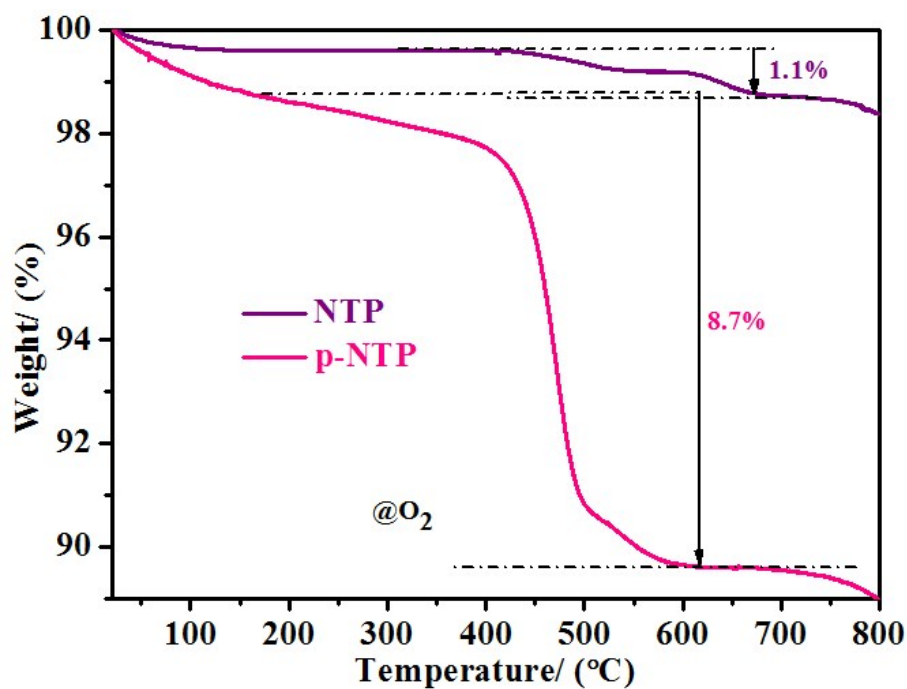

Fig. S4. TGA analysis of as-prepared materials under air at a heating rate of 5 °C min<sup>-1</sup>.

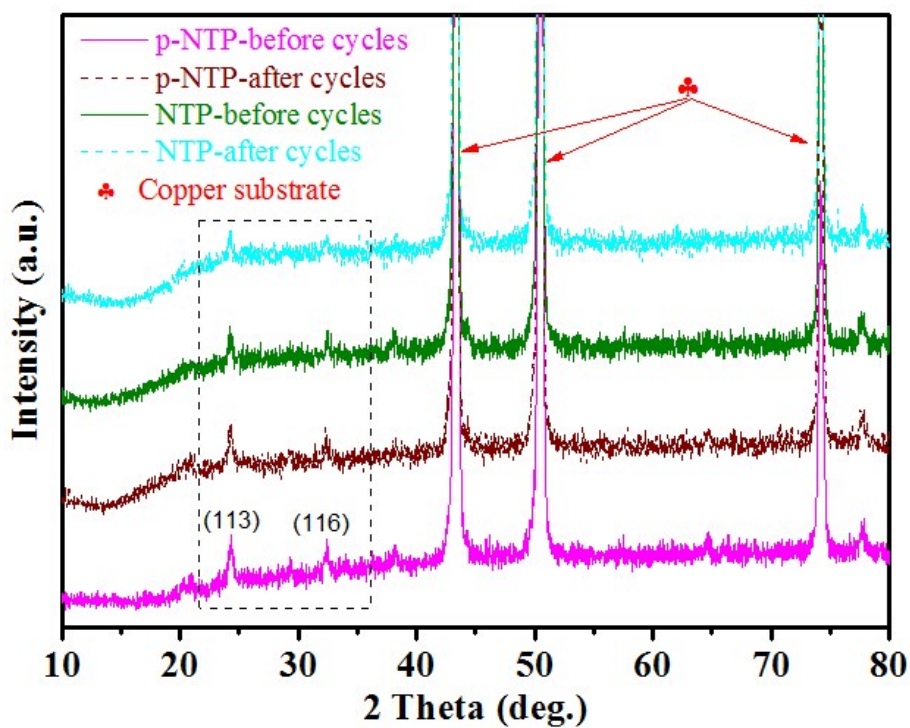

Fig. S5. XRD patterns of p-NTP NPs and NTP powders before and after the cycles, respectively.

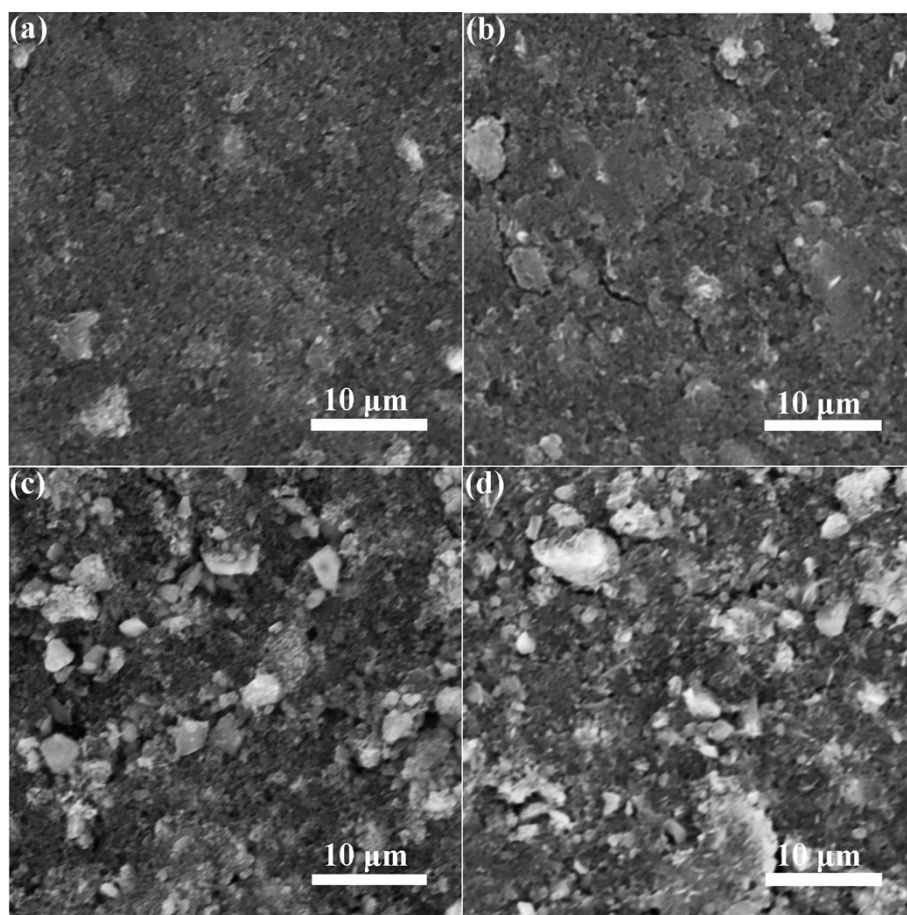

Fig. S6. SEM images of p-NTP NPs (a and b) and NTP powders (c and d) before and after the cycles, respectively.



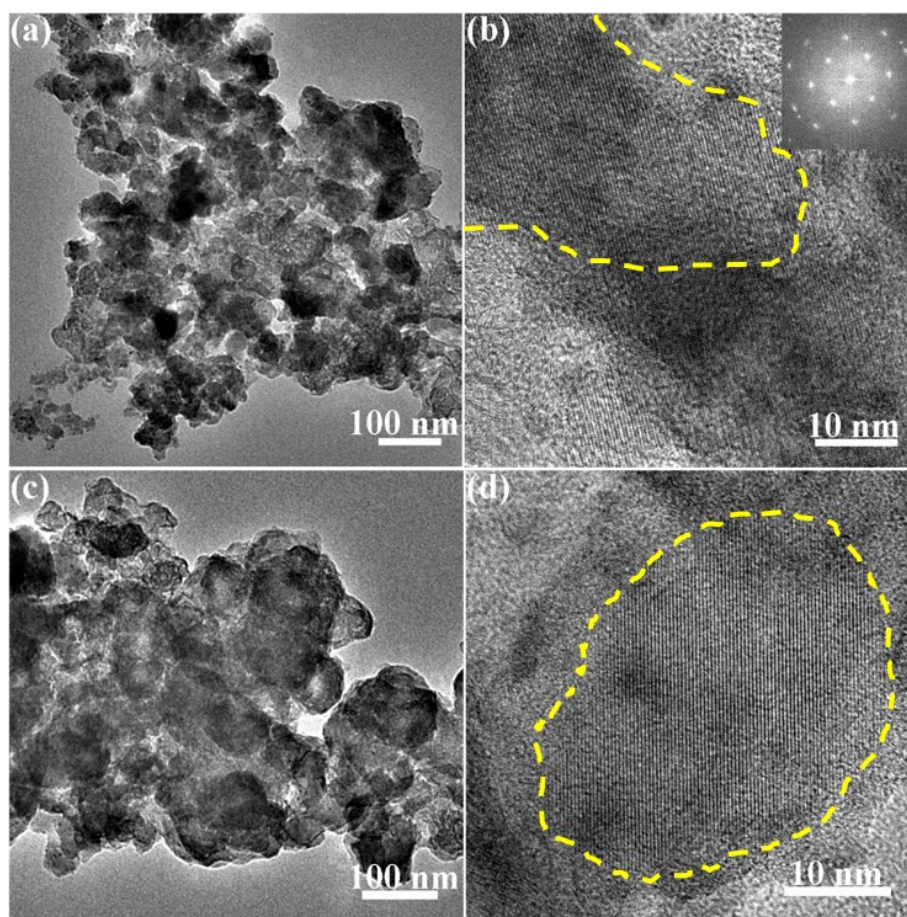

Fig. S7. TEM and HRTEM images of p-NTP NPs (a and b, the inset shows Fast Fourier Transforms (FFT) of the HRTEM image) and NTP powders (c and d) after the cycles.
